# Supplementary material for: Inhibition of polo-like kinase 4 (PLK4): a new therapeutic option for rhabdoid tumors and pediatric medulloblastoma
Source: PubMed Central journal article supplement (PMC5762315; doi:10.18632/oncotarget.22704), 2017-11-24
Supplement: oncotarget-08-111190-s001.pdf [file oncotarget-08-111190-s001.pdf]

## **Inhibition of polo-like kinase 4 (PLK4): a new therapeutic option for rhabdoid tumors and pediatric medulloblastoma**

### **SUPPLEMENTARY MATERIALS**

**Supplementary Table 1: CFI-400945 – Kinase screening.**

**See Supplementary File 1**
